# Supplementary material for: A Novel Molecular Mechanism of IKKε-Mediated Akt/mTOR Inhibition in the Cardiomyocyte Autophagy after Myocardial Infarction
Source: Hindawi journal article supplement (doi:10.1155/2020/7046923), 2020-07-17
Supplement: f1 [file 7046923.f1.zip]

Archive with 4 entries (4 files):
- mat.7046923.v2.docx
- Supplement 1_OMCL_3111520.psd
- Supplement 2_OMCL_3111521.psd
- Supplement 3_OMCL_3111522.psd
