# Supplementary material for: A Novel Molecular Mechanism of IKKε-Mediated Akt/mTOR Inhibition in the Cardiomyocyte Autophagy after Myocardial Infarction
Source: Hindawi journal article supplement (doi:10.1155/2020/7046923), 2020-07-17

**Supplement 1. IKKε increased in primary cardiac myocytes under starvation injury.** (A and B) Representative western blots and quantitative results of IKKε in primary cardiac myocytes. (n = 4-5 for each group). ***P<0.01* (C) Immunofluorescent staining of cardiac troponin T(cTnT) in primary cardiac myocytes (magniﬁcation, 400x)

**Supplement 2. Knockdown of IKKε activated the entire autophagy flux and blocking the autophagy flux by Baf reduced apoptosis in H9c2 cells under starvation injury.** (A and B) Representative western blots and quantitative results of LC3-Ⅰ/Ⅱ in H9c2 cells siIKKε-starvation group, siIKKε-starvation-Baf group (n = 4-5 for each group). ***P<0.01*. (C and D) Representative merged images of TUNEL staining of H9c2 cells under starvation with or without Baf (400 nM, 4 h) (n = 4-5 for each group, magniﬁcation, 400x). Nuclei (DAPI blue), positive staining (red). scale bar represents 25μm. ***P<0.01*.

**Supplement 3. IKKε didn’t change the phosphorylation levels of ERK1/2, MEK1/2, Ikbα and p38.** (A) Representative western blots and quantitative results of phosphorylation and total protein levels of ERK1/2, MEK1/2, Ikbα and p38 in H9c2 cells in siCTRL-control group, siIKKε-control group, siCTRL-starvation group, siIKKε-starvation group (n = 4 for each group).

Supplement 1


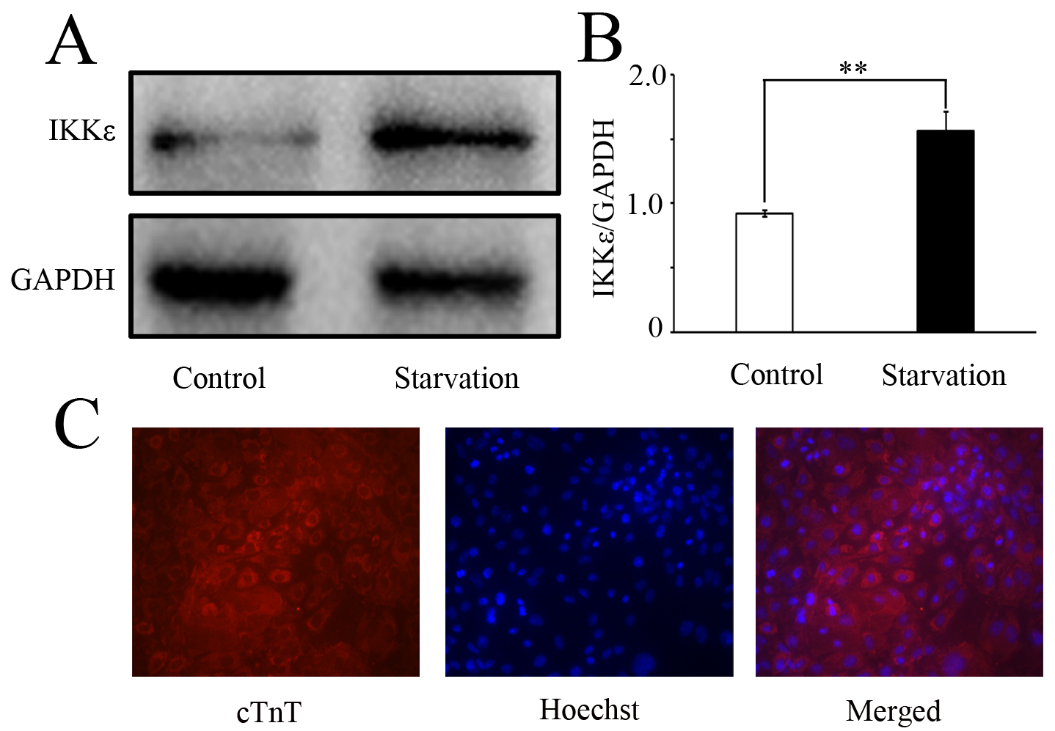


Supplement 2


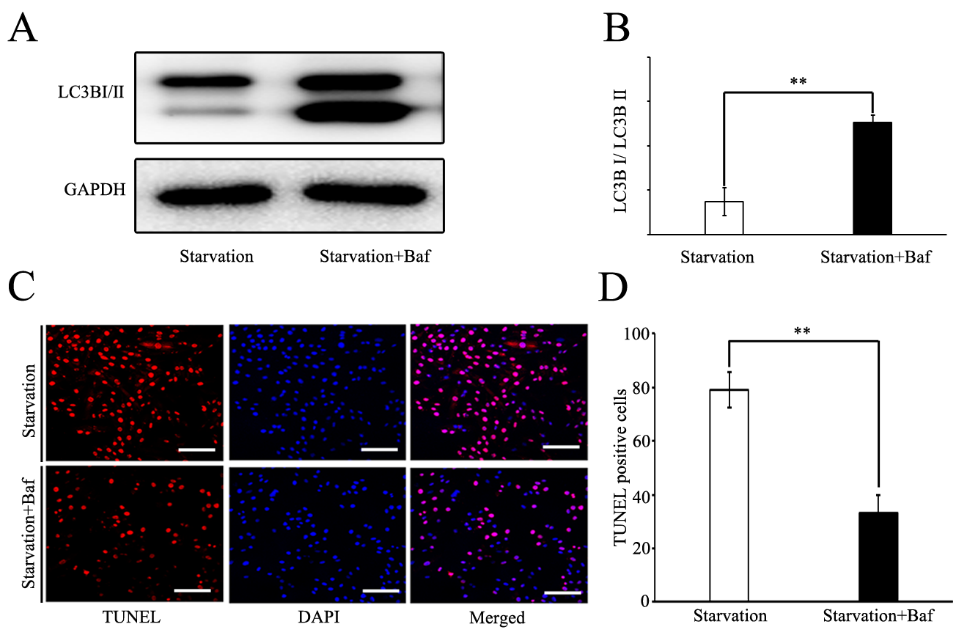


Supplement 3


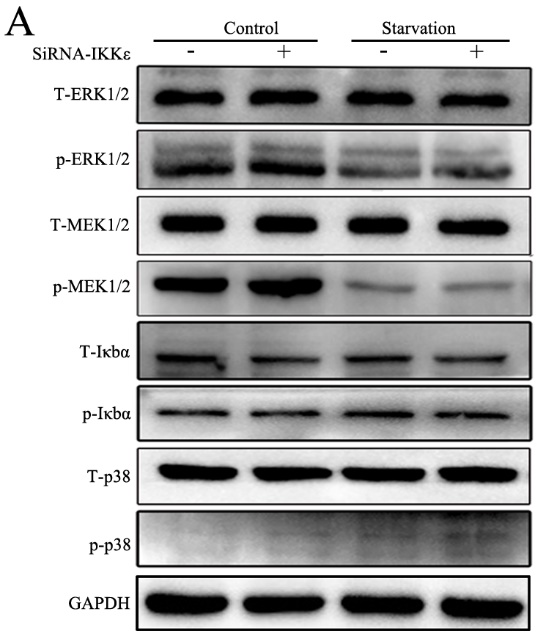

Supplement: f1 [file 7046923.f1.zip › mat.7046923.v2.docx]
